# Supplementary material for: Quantum mechanical calculations of the interactions between diazacrowns and the sodium cation: an insight into Na+ complexation in diazacrown-based synthetic ion channels
Source: Royal Society of Chemistry journal article supplement (doi:10.1039/c4ra14000a), 2015-01-01
Supplement: c4ra14000a1.pdf [file c4ra14000a1.pdf]

Table 1: Dihedral parameters added for force field calculations

| Dihedral | Kphi (kcal/mol) | $\theta_0$ (degrees) | Mult |
|----------|-----------------|----------------------|------|
| C-C-O-H  | -0.34098948     | 0                    | 1    |
| C-C-O-H  | 0.3780115       | 180                  | 2    |
| C-C-O-H  | 0.3780115       | 0                    | 3    |
| C-O-C-H  | 0.2849904       | 0                    | 1    |
| C-O-C-H  | 0.1599904       | 180                  | 2    |
| C-O-C-H  | 0.2849904       | 0                    | 3    |
| H-C-C-H  | 0.1419933       | 0                    | 1    |
| H-C-C-H  | -0.7166587      | 180                  | 2    |
| H-C-C-H  | 0.1570029       | 0                    | 3    |
| C-H-C-O  | -0.327010038    | 0                    | 1    |
| C-H-C-O  | 0.5359943       | 180                  | 2    |
| C-H-C-O  | 0.1400096       | 0                    | 3    |
| C-C-O-C  | -0.34098948     | 0                    | 1    |
| C-C-O-C  | 0.3780115       | 180                  | 2    |
| C-C-O-C  | 0.3780115       | 0                    | 3    |
| O-C-C-O  | 0.2039914       | 0                    | 1    |
| O-C-C-O  | 0.6989962       | 180                  | 2    |
| O-C-C-O  | 0.4799952       | 0                    | 3    |
| O-C-C-N  | 0.15            | 0                    | 3    |
| C-C-N-C  | -0.22000478     | 0                    | 1    |
| C-C-N-C  | 0.3929971       | 180                  | 2    |
| C-C-N-C  | 0.1359943       | 0                    | 3    |
| H-C-C-N  | -0.37198853     | 0                    | 1    |

|         |             |     |   |
|---------|-------------|-----|---|
| H-C-C-N | -0.61699331 | 180 | 2 |
| H-C-C-N | 0.169001    | 0   | 3 |
| C-N-C-H | 0.1969885   | 0   | 1 |
| C-N-C-H | -0.19299713 | 180 | 2 |
| C-N-C-H | 0.280999    | 0   | 3 |

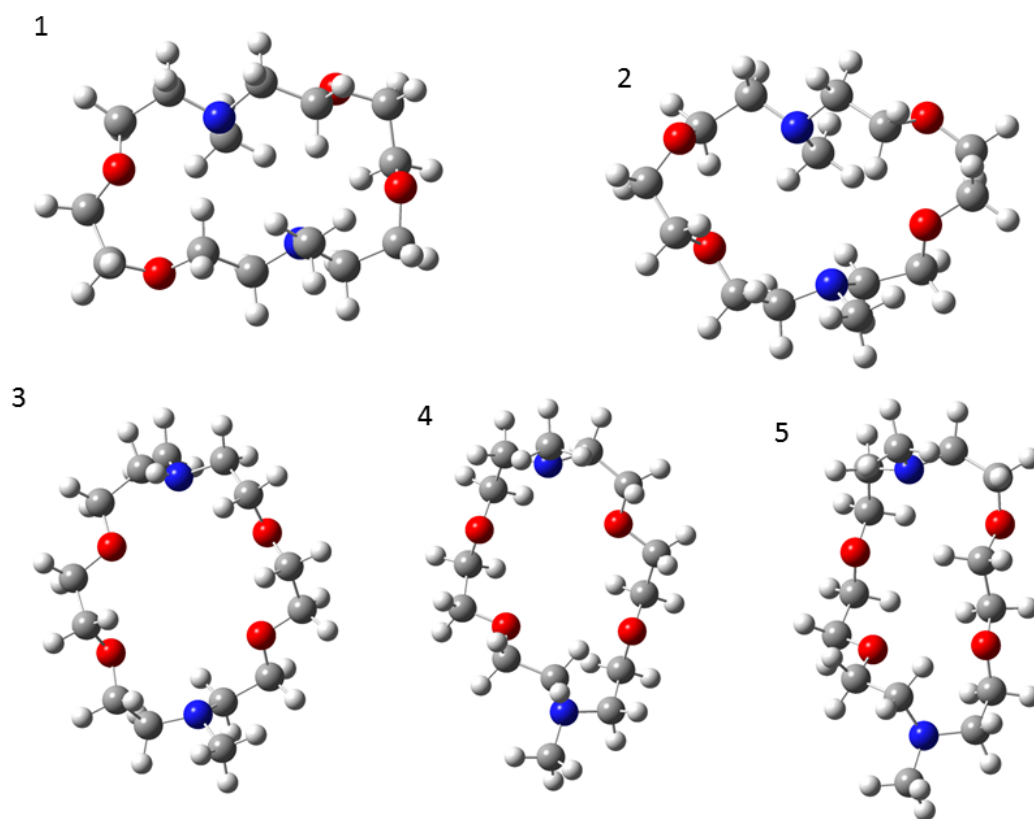

Figure S1 : Configurations related to the scans in Figure 3a (N-N scans).

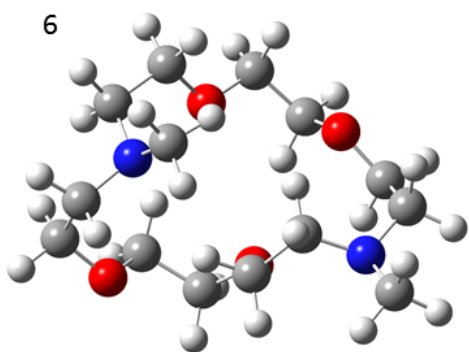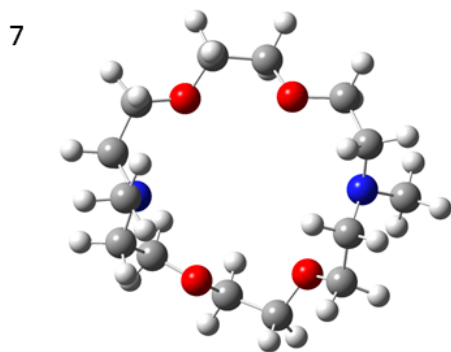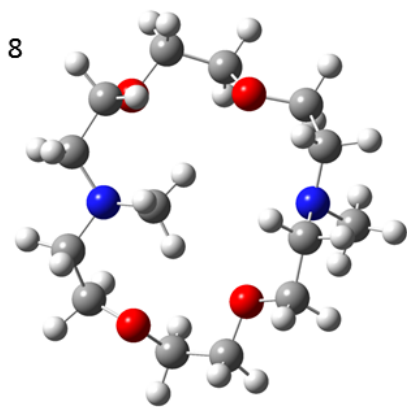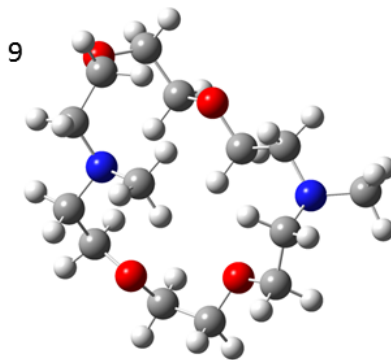

Figure S2 : Configurations related to the scans in Figure 3a (O-O scans).

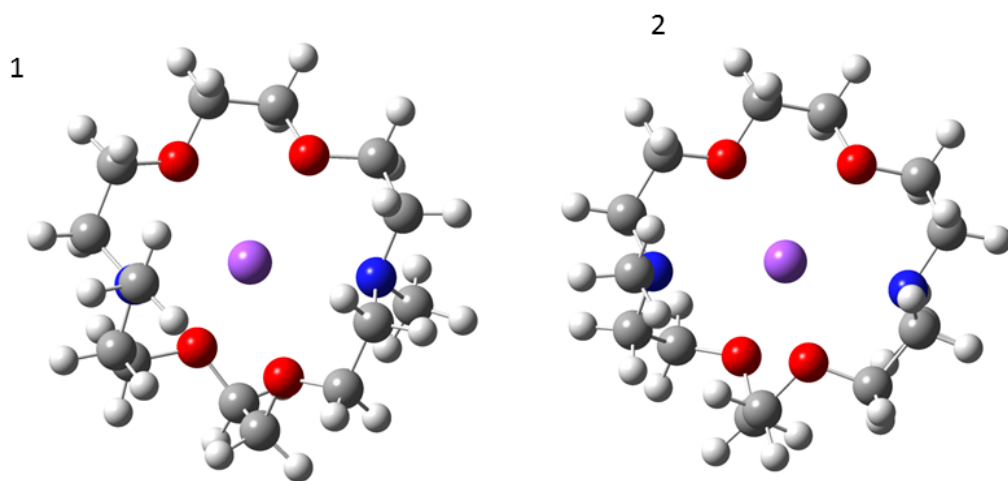

Figure S3 : Configurations related to the scans in Figure 3 b).

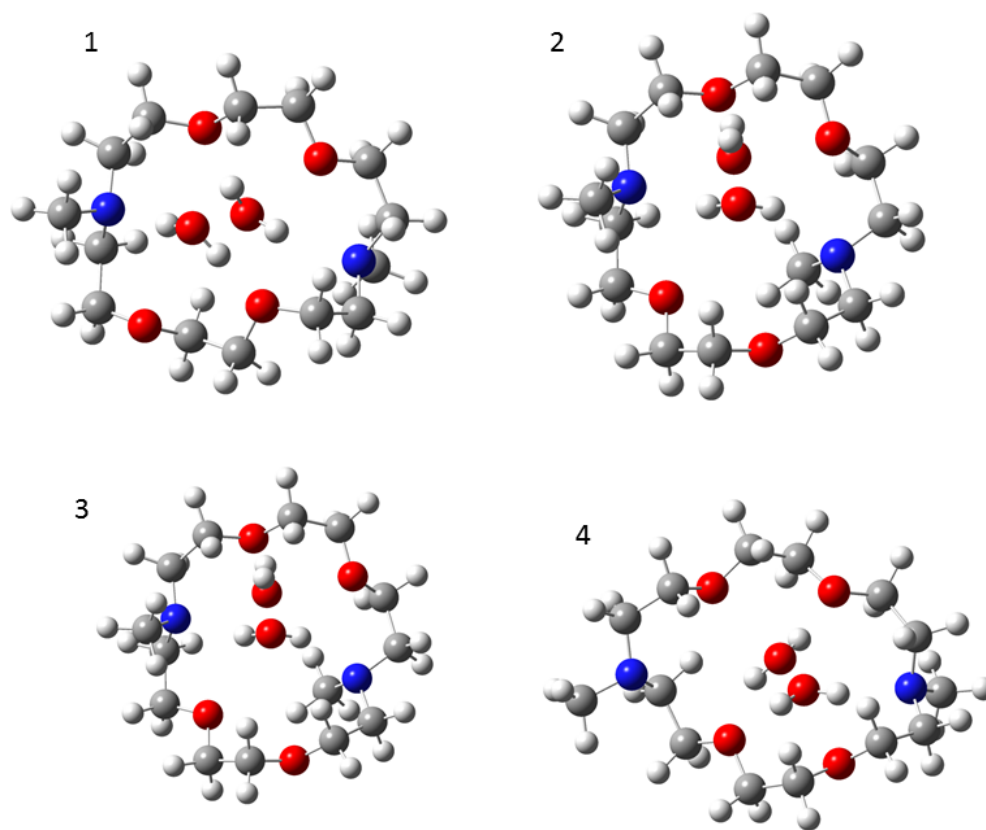

Figure S4: Configurations related to the scans in Figure 3c (N-N scans).

1

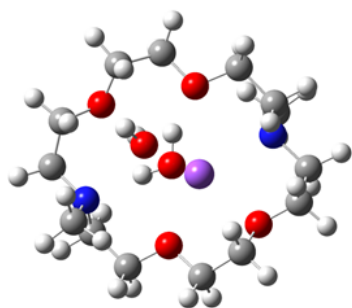

2

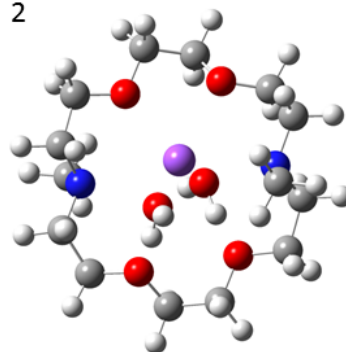

3

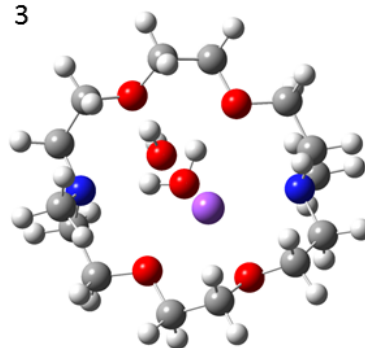

Figure S5: Configurations related to the scans in Figure 3d

Table S2: Relative, Enthalpy, Entropy and free energy

|                 | Enthalpy (kcal/mol) | Entropy (cal/mol/k) | Free energy(kcal/mol) |
|-----------------|---------------------|---------------------|-----------------------|
| D <sub>3d</sub> | 8.13                | 7.76                | 5.81                  |
| C <sub>i</sub>  | 0                   | 0                   | 0                     |
| Mixed           | 1.91                | 3.50                | 0.87                  |

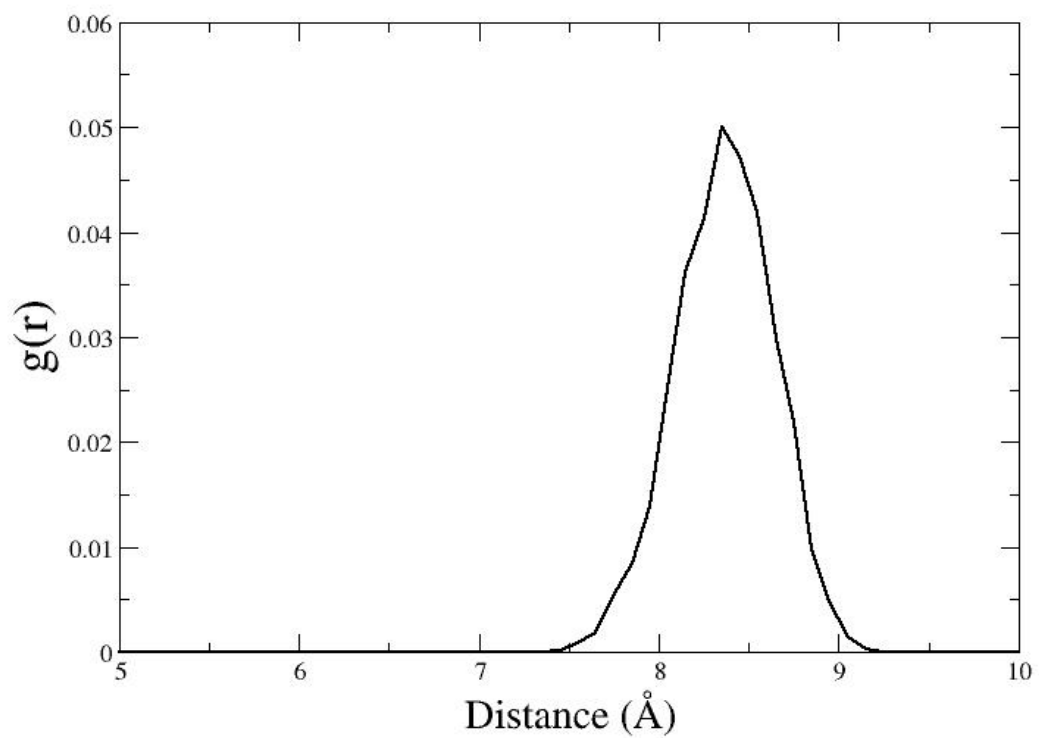

Figure S6: Diazacrown-N-N distances from the molecular dynamics simulation of hydrophile complexed to  $\text{Na}^+$  as it is being pulled through a lipid bilayer.

### **Effect of Solvation model on intermolecular distances**

The distances are affected by using the solvation model but most drastically are those involving explicit water molecules. For the diazacrown/water system, the water becomes bound to only two atoms, the nitrogen and one oxygen rather than two oxygen atoms; it moves farther from one oxygen atom and closer to the nitrogen and oxygen. For the Na<sup>+</sup>-water system, the distance is considerably greater for the PCM model than in the gas phase. For the diazacrown-Na<sup>+</sup> cluster the Na<sup>+</sup> to crown oxygen and Na<sup>+</sup> to crown nitrogen atom distances becomes greater. The distances for the Diazacrown-Na<sup>+</sup>-water system showed similar trends where the main difference between the solvation model and gas phase was in the Na<sup>+</sup>-water distance, which increased due to solvation, in line with the Na<sup>+</sup>-water system.

### **Water mediated charge-transfer for Configuration 3 of diazacrown-Na<sup>+</sup>-water cluster**

There is electron transfer from both water molecules to the Na<sup>+</sup> (stabilization energies of water-O, 11.80 and water O-N, 10.65 kcal/mol). There is also electron transfer from the diazacrown to the two water molecules, which is part of the water mediated electron transfer. For Water O-N, there is transfer from both the crown oxygen (4.58 kcal/mol) and nitrogen (9.71 kcal/mol) lone pairs to water O-H anti-bonding orbitals. For Water O, there is only electron transfer (11.70 kcal/mol) from the crown oxygen lone pair to the water antibonding orbitals (no nitrogen to water transfer).
